# Supplementary material for: Machine Learning Prediction of Liver Allograft Utilization From Deceased Organ Donors Using the National Donor Management Goals Registry
Source: PubMed Central journal article supplement — Transplant Direct. 2021 Sep 27;7(10):e771. doi: 10.1097/TXD.0000000000001212 (PMC8478404; doi:10.1097/txd.0000000000001212), 2021-09-27

## Supplementary Materials:

**Table S1.** Confidence intervals on ROC-AUC

|                             | Lower CI | ROC-AUC | Upper CI |
|-----------------------------|----------|---------|----------|
| DSRI original coefficients  | 0.6460   | 0.6694  | 0.6928   |
| DSRI retrained coefficients | 0.7029   | 0.7241  | 0.7452   |
| ANN                         | 0.7253   | 0.7465  | 0.7678   |
| LR                          | 0.7730   | 0.7926  | 0.8123   |
| RF                          | 0.8111   | 0.8286  | 0.8462   |
| GBM                         | 0.8214   | 0.8383  | 0.8553   |

**Figure S1:** Significance of difference test between the ROC from different models. Testing was performed using de Long method.

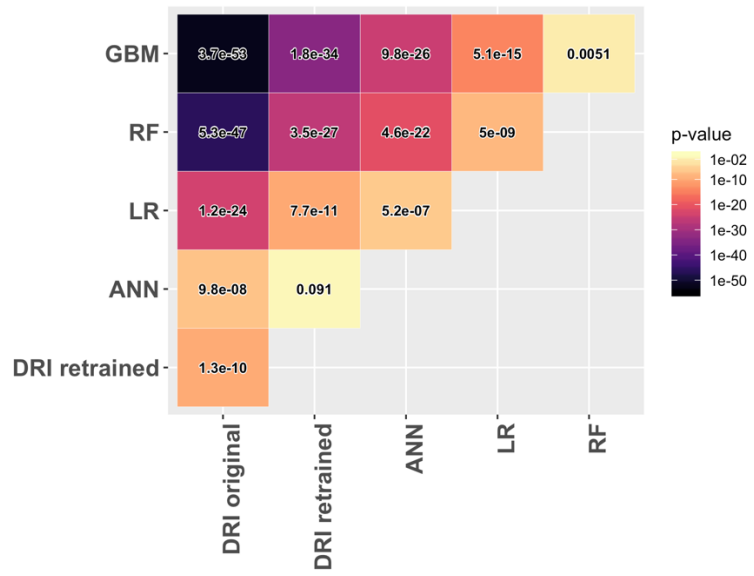

Supplement: txd-7-e771-s001.pdf [file txd-7-e771-s001.pdf]
